# Supplementary material for: Comparison of Spectroscopy-Based Methods and Chemometrics to Confirm Classification of Specialty Coffees
Source: MDPI journal article supplement (doi:10.3390/foods11111655), 2022-06-04
Supplement: s1 [file s1]

Table S1 – Coffee sample provenance; sensory scores and description provided by the Q-graders

| Sample | Provenance          |    | Process           | Coffee variety   | Sensory Score<br>(mean±SD)* | Sensory Description                                                           |
|--------|---------------------|----|-------------------|------------------|-----------------------------|-------------------------------------------------------------------------------|
| A1     | Serra Salitre       | do | Natural           | Catuaí Vermelho  | 91.2±1.0                    | Floral, sweet notes, caramel, cocoa and red berries                           |
| A2     | Araxá               |    | Natural           | Topázio MG1190   | 91.0±1.0                    | Jaboticaba** liquor, cognac, malt, dark chocolate, blackberry, grape, currant |
| A3     | Coromandel          |    | Natural           | Bourbon Amarelo  | 90.4±1.5                    | Sweet caramel notes, tropical fruits, spices                                  |
| A4     | Patos Minas         | de | Pulped<br>Natural | IAC 125 RN       | 88.7±1.0                    | Mainly sweet and caramel, milk chocolate notes                                |
| A5     | Patrocínio          |    | Pulped<br>Natural | Acaiá do Cerrado | 88.4±1.0                    | Milk chocolate, caramel, buttery                                              |
| A6     | Presidente Olegário |    | Pulped<br>Natural | Bourbon Amarelo  | 88.2±1.0                    | Cocoa notes, red berries, sugary/caramel almonds                              |
| A7     | Patos Minas         | de | Natural           | Catuaí Vermelho  | 87.7±2.0                    | Milk chocolate, red berries                                                   |
| A8     | Patrocínio          |    | Natural           | Bourbon Vermelho | 87.6±1.6                    | Fruity, acid, caramel                                                         |
| A9     | Campos Altos        |    | Natural           | Topázio MG1190   | 87.6±2.5                    | Milk chocolate, red berries                                                   |

|     |                       |                   |                    |          |                                                                        |
|-----|-----------------------|-------------------|--------------------|----------|------------------------------------------------------------------------|
| A10 | Patrocínio            | Natural           | Bourbon<br>Amarelo | 87.2±1.5 | Intense sweet aroma, milk chocolate                                    |
| A11 | Araxá                 | Natural           | Catuaí<br>Vermelho | 87.0±1.5 | Sweet caramel notes, almonds                                           |
| A12 | Araxá                 | Natural           | Topázio            | 87.0±1.2 | Fruity, passion fruit, mango, honey                                    |
| A13 | Campos<br>Altos       | Pulped<br>Natural | Bourbon<br>Amarelo | 86.0±1.0 | Milk chocolate, nuts, caramel                                          |
| A14 | Araxá                 | Natural           | Bourbon<br>Amarelo | 86.0±1.5 | Milk chocolate, caramel creamy mango, clean, sweet and delicate flavor |
| A15 | Araxá                 | Natural           | Catuaí<br>Vermelho | 86.0±1.5 | Milk chocolate, caramel, blackberry, jaboticaba**                      |
| A16 | Araxá                 | Natural           | Catuaí<br>Vermelho | 86.0±1.2 | Vanilla, chocolate, fruity, passion fruit notes                        |
| A17 | Araxá                 | Natural           | Topázio            | 83.0±0.8 | Chocolate, hazelnut                                                    |
| A18 | Campos<br>Altos       | Natural           | Catuaí<br>Amarelo  | 82.0±0.1 | Nuts, caramel                                                          |
| A19 | Carmo do<br>Paranaíba | Natural           | Catuaí<br>Vermelho | 82.0±0.3 | Nuts, caramel                                                          |
| A20 | Patrocínio            | Natural           | Mundo<br>Novo      | 82.0±0.3 | Nuts, caramel                                                          |
| A21 | Patos de<br>Minas     | Natural           | Catuaí<br>Vermelho | 82.0±0.3 | Nuts, caramel                                                          |

|     |                        |         |                    |          |                                 |
|-----|------------------------|---------|--------------------|----------|---------------------------------|
| A22 | Rio<br>Paranaíba       | Natural | Bourbon<br>Amarelo | 82.0±0.3 | Nuts, caramel                   |
| A23 | Coromandel             | Natural | Catuaí<br>Vermelho | 82.0±0.4 | Nuts, caramel                   |
| A24 | Patrocínio             | Natural | Catuaí<br>Vermelho | 82.0±0.5 | Nuts, caramel                   |
| A25 | Patrocínio             | Natural | Catuaí<br>Amarelo  | 81.0±0.2 | Nuts, caramel                   |
| A26 | Presidente<br>Olegário | Natural | Catuaí<br>Vermelho | 81.0±0.2 | Nuts, caramel, lacks complexity |
| A27 | Rio<br>Paranaíba       | Natural | Catuaí<br>Vermelho | 81.0±0.3 | Nuts, caramel                   |
| A28 | Coromandel             | Natural | Catuaí<br>Vermelho | 81.0±0.4 | Nuts, caramel                   |

---

\*SD = standard deviation \*\*Brazilian fruit – “*Plinia cauliflora*”
